# Supplementary material for: A novel quantitative high-throughput screen identifies drugs that both activate SUMO conjugation via the inhibition of microRNAs 182 and 183 and facilitate neuroprotection in a model of oxygen and glucose deprivation
Source: PubMed Central journal article supplement (PMC4759677; doi:10.1177/0271678x15609939), 2015-10-23
Supplement: Supplementary_Material_939.pdf [file Supplementary_Material_939.pdf]

For **pmirGLO** (between PmeI and XbaI, with NotI as an internal site)

PmeI
NotI
miR-182/183 target sequence
XbaI  
 miR-182 sense: 5'-AAACTAGCGGCCGCTAGTAGTGTGAGTTCTACCATTGCCAAAT-3'  
 miR-183 sense: 5'-AAACTAGCGGCCGCTAGTAGTGAATTCTACCAGTGCCATAT-3'

XbaI
miR-182/183 target sequence
NotI
PmeI  
 miR-182 antisense: 5'-CTAGATTTGGCAATGGTAGAACTCACACTACTAGCGGCCGCTAGTTT-3'  
 miR-183 antisense: 5'-CTAGATATGGCACTGGTAGAATTCACTACTAGCGGCCGCTAGTTT-3'

For **psiCHECK1** (between SgfI and PmeI, with SacI as an internal site)

SgfI
SacI
miR-182/183 target sequence
PmeI  
 miR-182 sense: 5'-CGCAGTAGAGCTCTAGTAAAGTGTGAGTTCTACCATTGCCAAAGTTT-3'  
 miR-183 sense: 5'-CGCAGTAGAGCTCTAGTAAAGTGAATTCTACCAGTGCCATAGTTT-3'

PmeI
miR-182 /183 target sequence
SacI
SgfI  
 miR-182 antisense: 5'- AAACTTTGGCAATGGTAGAACTCACACTTACTAGAGCTCTACTGCGAT -3'  
 miR-183 antisense : 5'- AAACTATGGCACTGGTAGAATTCACTTACTAGAGCTCTACTGCGAT -3'

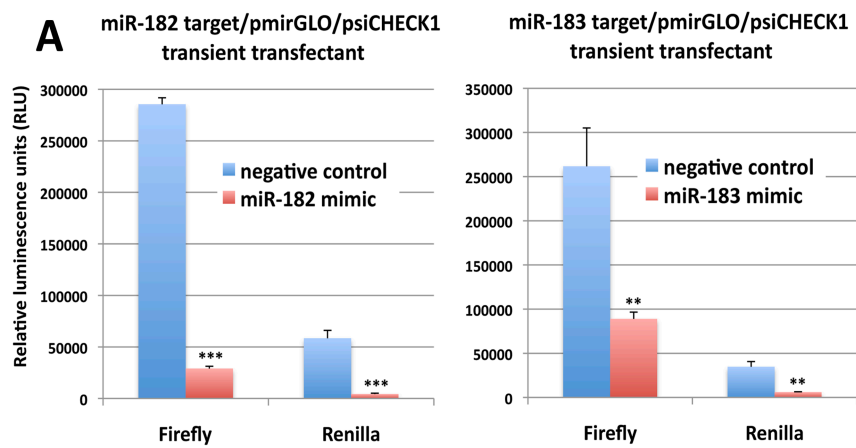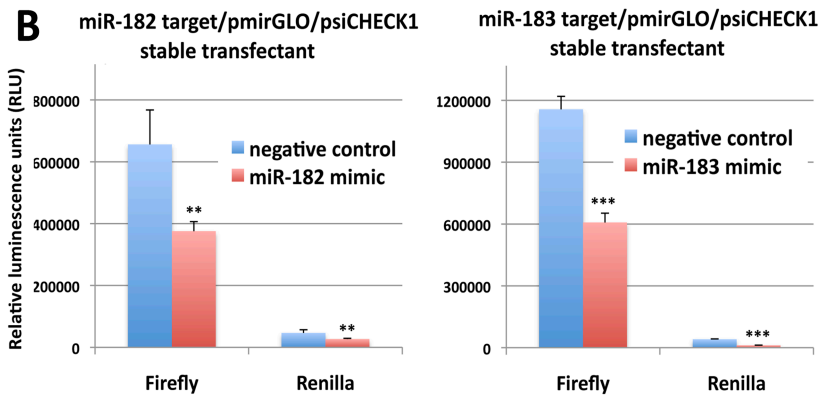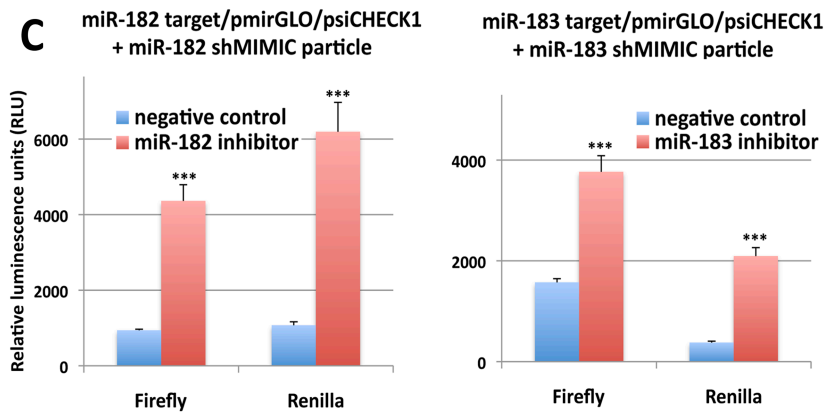

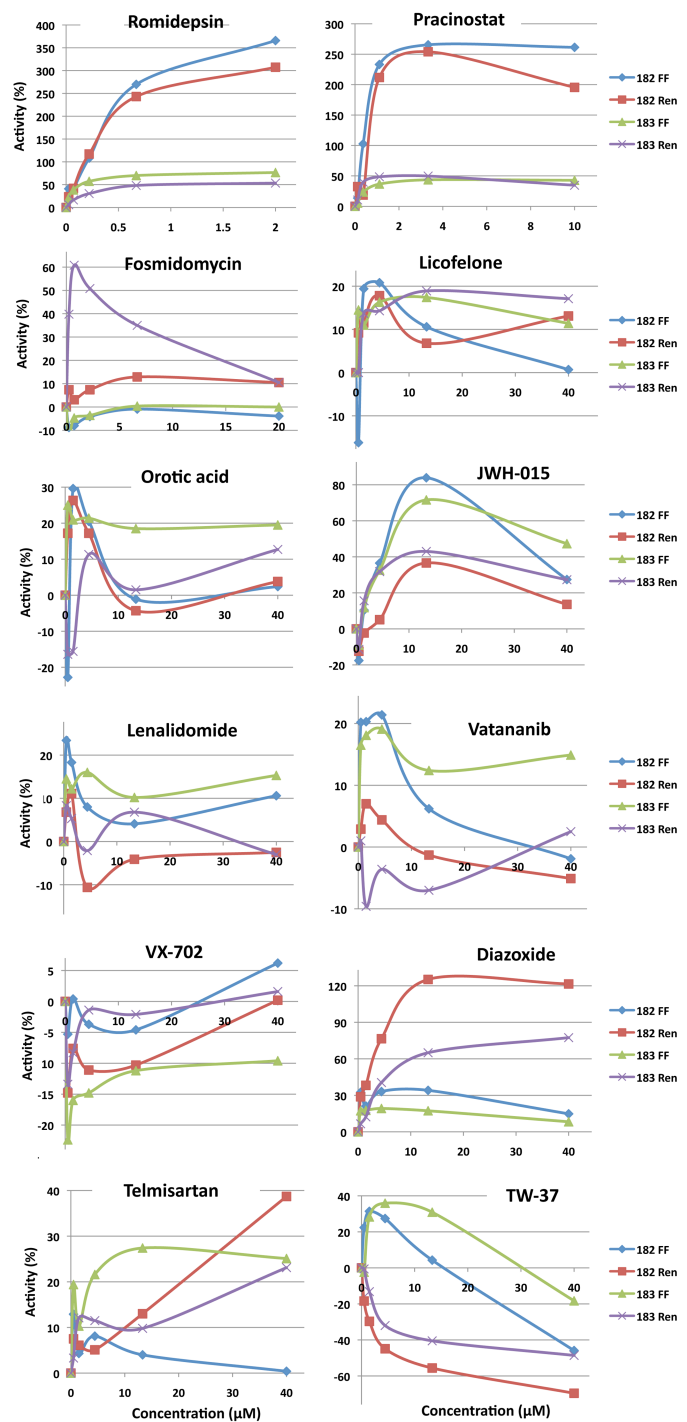

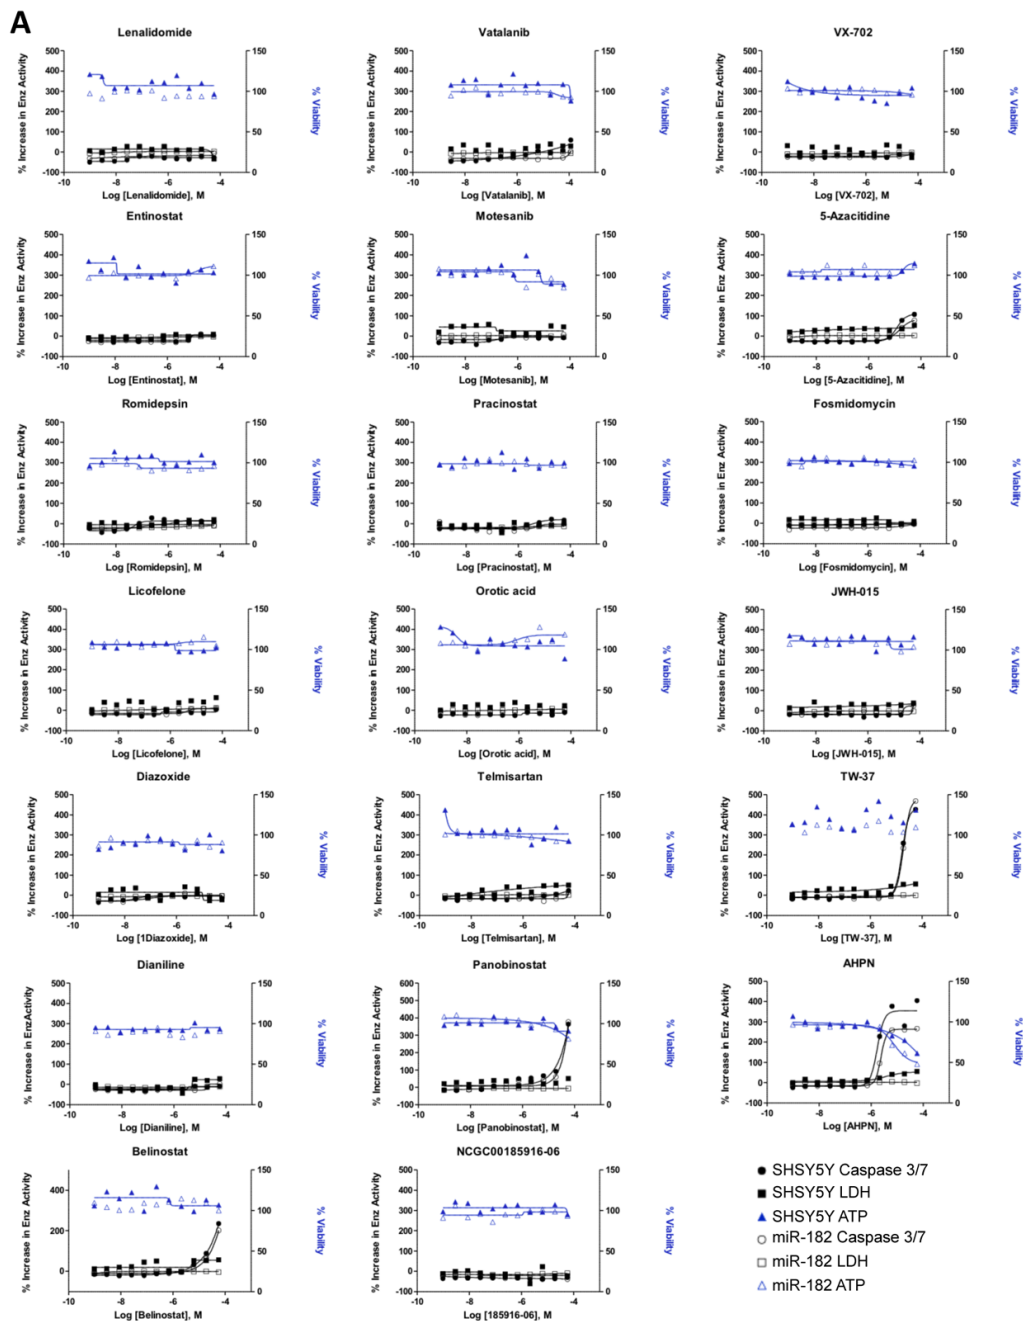

**B**

| Compound  | Name            | Cytotoxicity?    | Western Low Dose ( $\mu\text{M}$ ) | Western High Dose ( $\mu\text{M}$ ) |
|-----------|-----------------|------------------|------------------------------------|-------------------------------------|
| 15380-09  | Diazoxide       | N                | 5                                  | 50                                  |
| 165833-04 | Entinostat      | N                | 2                                  | 10                                  |
| 249684-01 | VX-702; KVK-702 | N                | 10                                 | 50                                  |
| 264107-01 | Fosmidomycin    | N                | 0.2                                | 2                                   |
| 181350-02 | Vatalanib       | Caspase 3/7      | 2                                  | 10                                  |
| 167491-03 | Lenalidomide    | N                | 5                                  | 50                                  |
| 95150-06  | Telmisartan     | N                | 10                                 | 50                                  |
| 92284-02  | AHPN            | Caspase 3/7; ATP | 5                                  | 20                                  |
| 263205-01 | Motesanib       | N                | 10                                 | 50                                  |
| 90851-08  | 5-Azacididine   | Caspase 3/7      | 1                                  | 10                                  |
| 250374-01 | Licofelone      | N                | 2                                  | 20                                  |
| 91357-01  | Orotic acid     | N                | 2                                  | 10                                  |
| 263155-01 | Belinostat      | Caspase 3/7      | 2                                  | 10                                  |
| 15575-04  | JWH-015         | N                | 10                                 | 50                                  |
| 263208-01 | TW-37           | Caspase 3/7      | 2                                  | 20                                  |
| 263117-01 | Panobinostat    | Caspase 3/7      | 0.2                                | 2                                   |
| 160373-01 | Dianiline       | N                | 10                                 | 50                                  |
| 185916-06 | NCGC00185916    | N                | 5                                  | 20                                  |
| 263136-03 | Pracinostat     | N                | 1                                  | 5                                   |
| 263220-01 | Romidepsin      | N                | 0.1                                | 1                                   |

|    | <b>Molecular Entity</b> | <b>OGD (<math>\mu\text{M}</math>)</b> |
|----|-------------------------|---------------------------------------|
| 1  | <u>Romidepsin</u>       | 0.1                                   |
| 2  | <u>Panobinostat</u>     | 0.05                                  |
| 3  | <u>Entinostat</u>       | 2                                     |
| 4  | <u>Belinostat</u>       | 2                                     |
| 5  | <u>Pracinostat</u>      | 1                                     |
| 6  | <u>Fosmidomycin</u>     | 2                                     |
| 7  | NCGC00185916            | 5                                     |
| 8  | <u>Licofelone</u>       | 2                                     |
| 9  | <u>Motesanib</u>        | 5                                     |
| 10 | Orotic acid             | 5                                     |
| 11 | JWH-015                 | 10                                    |
| 12 | 5-Azacitidine           | 1                                     |
| 13 | AHPN                    | 1                                     |
| 14 | <u>Lenalidomide</u>     | 10                                    |
| 15 | <u>Vatalanib</u>        | 5                                     |
| 16 | VX-702; <u>KVK-702</u>  | 10                                    |
| 17 | <u>Dianiline</u>        | 5                                     |
| 18 | Diazoxide               | 5                                     |
| 19 | Telmisartan             | 10                                    |
| 20 | JQ1                     | 0.5                                   |
| 21 | TW-37                   | 2                                     |

## Supplemental Table 2

| Compound      | Number of IPA <sup>1</sup> associated Genes | Number of IPA <sup>1</sup> stroke-associated <sup>2</sup> Genes | Chi-square <sup>3</sup> yates corrected P | IPA <sup>1</sup> stroke-associated Genes |
|---------------|---------------------------------------------|-----------------------------------------------------------------|-------------------------------------------|------------------------------------------|
| Romidepsin    | 70                                          | 7                                                               | <0.0001                                   | HDAC9,INSR,ITGAV,MMP9,PTGS2,SLC1A2,TP53  |
| Panobinostat  | 33                                          | 1                                                               | 0.0166                                    | PTGS2                                    |
| Entinostat    | 84                                          | 3                                                               | <0.0001                                   | AIFM1,HDAC9,MMP9                         |
| Belinostat    | 13                                          | 1                                                               | <0.0001                                   | HDAC9                                    |
| Licofelone    | 2                                           | 2                                                               | <0.0001                                   | PTGS1,PTGS2                              |
| Motesanib     | 5                                           | 0                                                               | 0.977                                     | NA                                       |
| Orotic acid   | 15                                          | 0                                                               | 0.931                                     | NA                                       |
| JWH-015       | 14                                          | 2                                                               | <0.0001                                   | NOS3,RHOA                                |
| 5-Azacididine | 124                                         | 2                                                               | 0.1712                                    | NOS3,PTGS2                               |
| AHPN          | 223                                         | 4                                                               | 0.1554                                    | CCL5,FAS,S100P,TP53                      |
| Lenalidomide  | 136                                         | 2                                                               | 0.2641                                    | GABRB2,TP53                              |
| Vatalanib     | 14                                          | 1                                                               | <0.0001                                   | MMP9                                     |
| Diazoxide     | 47                                          | 4                                                               | <0.0001                                   | ADIPOQ,AIFM1,GJA1,INS                    |
| Telmisartan   | 65                                          | 6                                                               | <0.0001                                   | ADIPOQ,AGTR1,MMP9,NOS3,PTGS2,SLC6A3      |

<sup>1</sup> IPA: Ingenuity Pathway Analysis ([www.ingenuity.com](http://www.ingenuity.com))

<sup>2</sup> Total number of IPA<sup>1</sup> stroke-associated genes = 143

<sup>3</sup> Total number of genes in genome = 30k

## Supplemental Figure Legends

- **Supplemental 1. Oligonucleotide sequences.** Oligonucleotide pairs were engineered to contain the miR-182 (or miR-183) target sequence with restriction sites (PmeI and XbaI for pmiR-GLO, and SgfI and PmeI for psiCHECK-1, and an internal restriction site (NotI for pmiR-GLO and SacI for psiCHECK-1) for clone confirmation.
- **Supplemental 2. Confirmation of final constructs and/or stable transfectants for the reporter assays.** **A:** SHSY5Y parent cells were transiently co-transfected with the final constructs (miR-182 target or miR-183 target) and either a miR negative control or miR-182 (or miR-183) mimic. The firefly and Renilla luciferase activities were measured after 24 h of incubation. **B:** Stable SHSY5Y transfectants that contained the final constructs (either miR-182 target or miR-183 target in pmiR-GLO/psiCHECK-1) were transfected with either a miR negative control or miR-182 (or miR-183) mimic. The firefly and Renilla luciferase activities were measured after 24 h of incubation. **C:** Stable SHSY5Y transfectants that contained the final constructs (either miR-182 target or miR-183 target in pmiR-GLO/psiCHECK-1) plus lentiviral particles containing miR-182 (or miR-183) shMIMIC were transfected with either miR-182 (or miR-183) specific inhibitors or non-specific miRNA negative controls. The firefly and Renilla luciferase activities were measured after 24 h of incubation. Of note all assays were conducted in quintuplicate utilizing a 96-well format.
- **Supplemental 3. Dose response of remaining MEs identified by qHTS.**
- **Supplemental 4. Cytotoxicity assays.** **A:** SHSY5Y and miR182 cells were plated at 2000 cells/well in 4uL/well and incubated O/N (16 hr) at 37C, 5% CO<sub>2</sub>. Compounds were incubated with cells for 13.5 hours and Caspase 3/7, LDH, and ATP fluorescent/luminescent assays were performed. **B.** List of the tested compounds and doses.
- **Supplemental Table 1. Concentrations of MEs utilized during OGD**
- **Supplemental Table 2. Stroke associated genes per ME**
